# Supplementary material
Source: PubMed Central journal article supplement (PMC1785256)

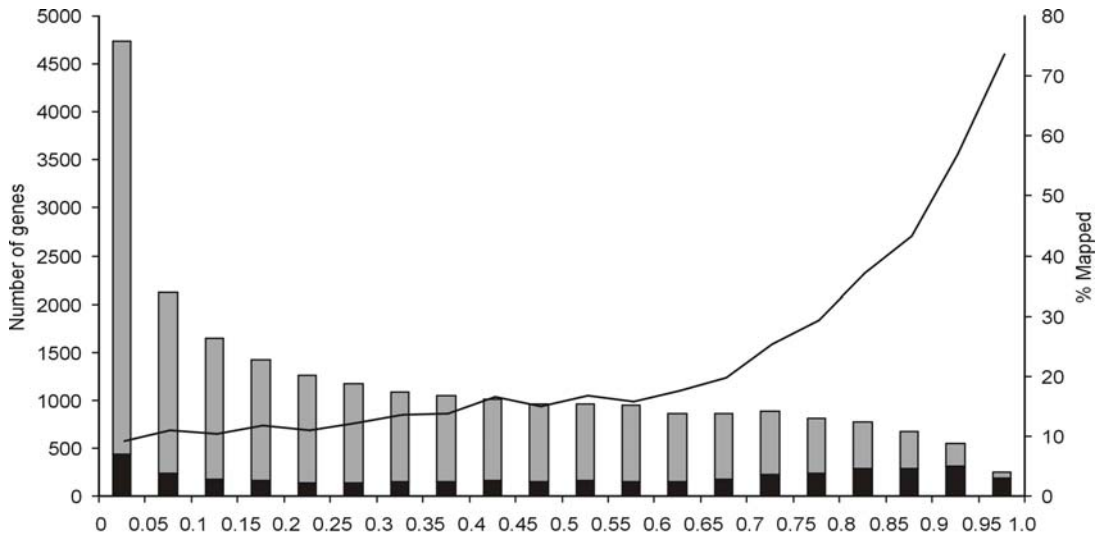

Supplement: pnas_0610429104_1.pdf [file pnas_0610429104_1.pdf]

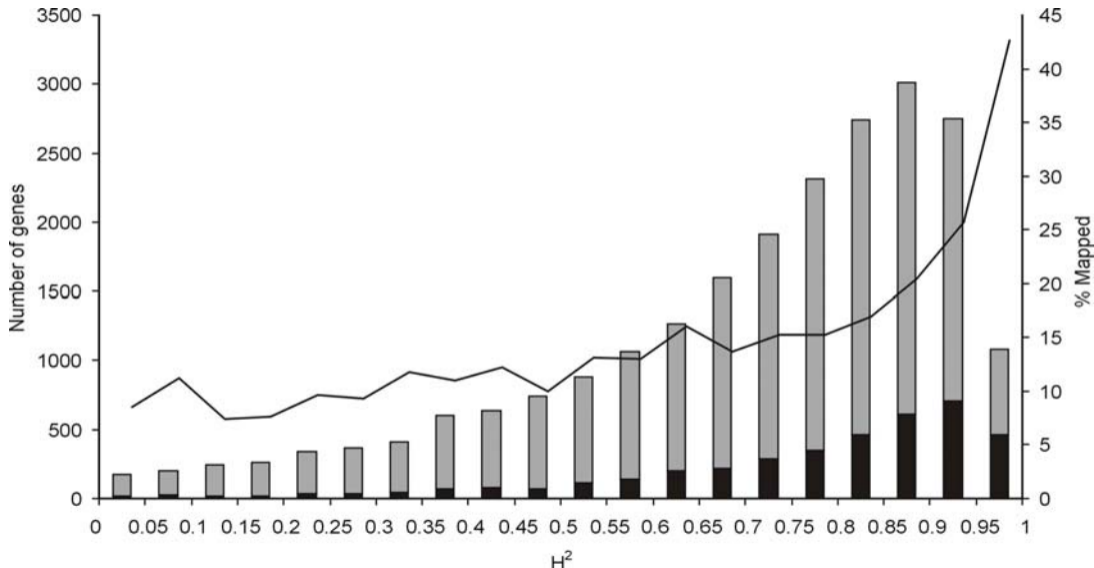

Supplement: pnas_0610429104_2.pdf [file pnas_0610429104_2.pdf]

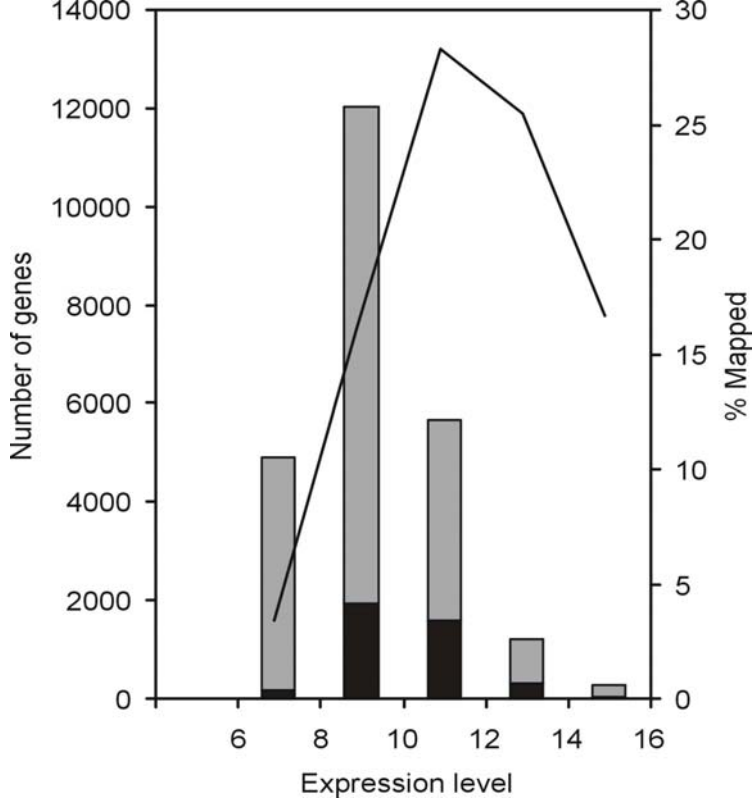

Supplement: pnas_0610429104_3.pdf [file pnas_0610429104_3.pdf]

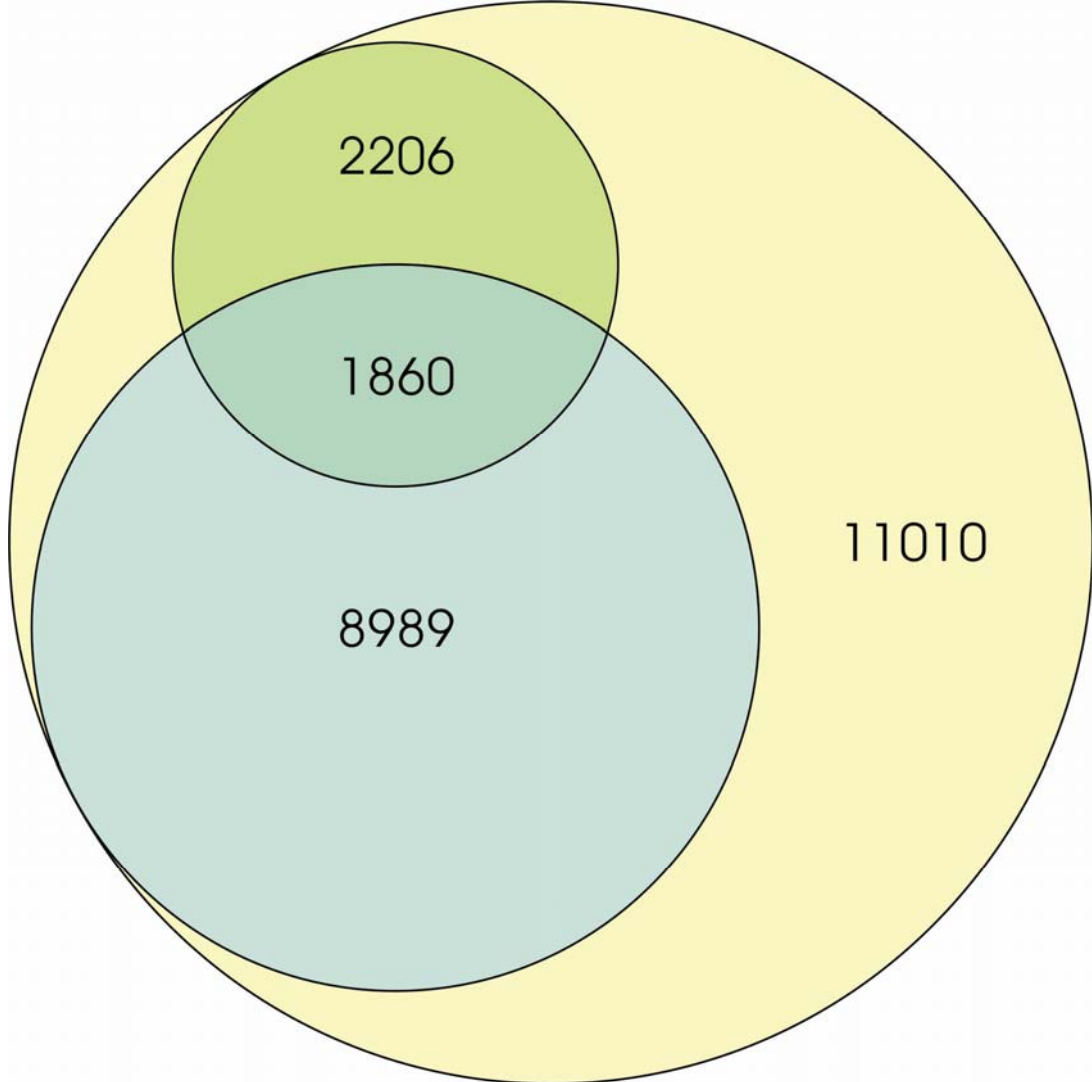

Supplement: pnas_0610429104_4.pdf [file pnas_0610429104_4.pdf]

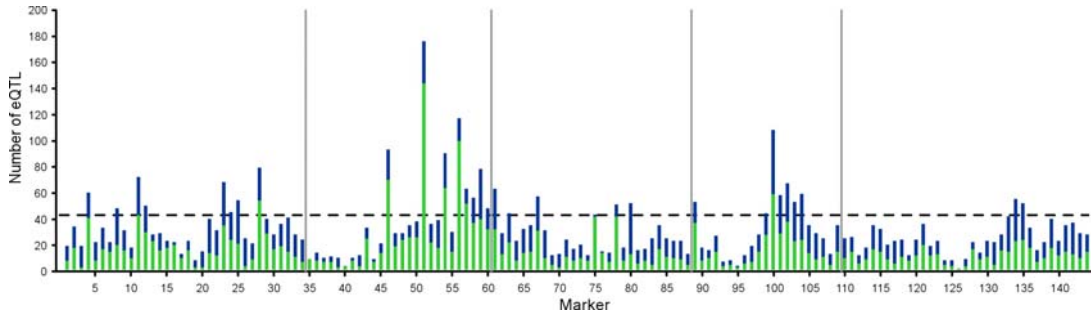

Supplement: pnas_0610429104_5.pdf [file pnas_0610429104_5.pdf]

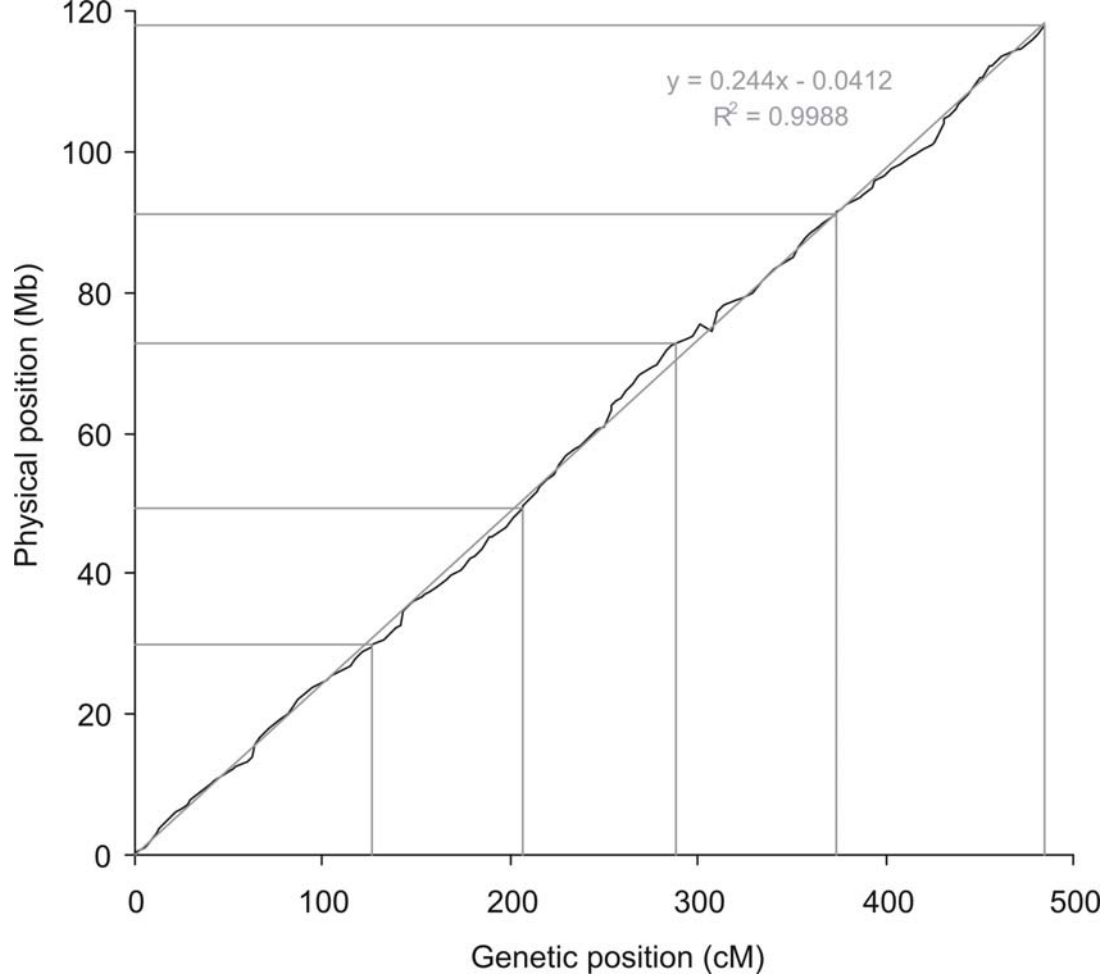

Supplement: pnas_0610429104_6.pdf [file pnas_0610429104_6.pdf]

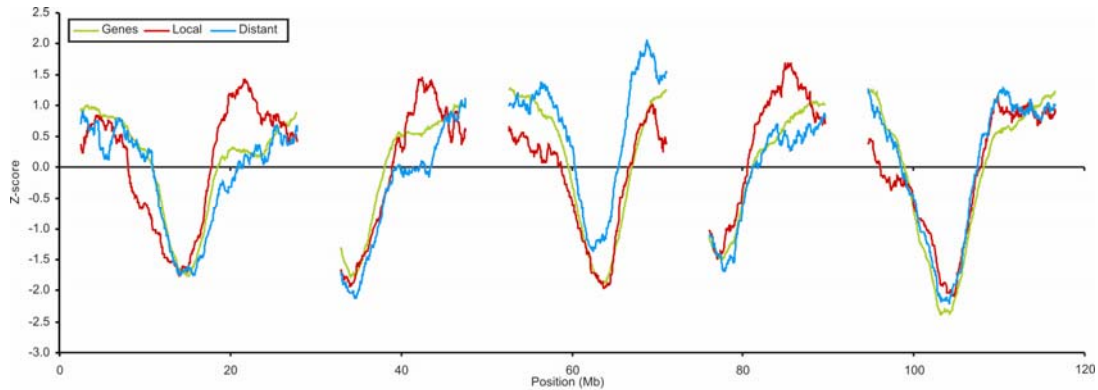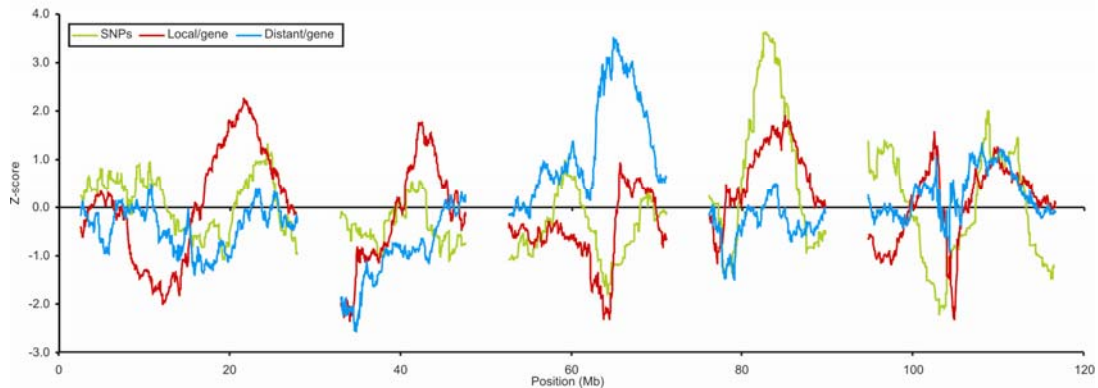

Supplement: pnas_0610429104_7.pdf [file pnas_0610429104_7.pdf]

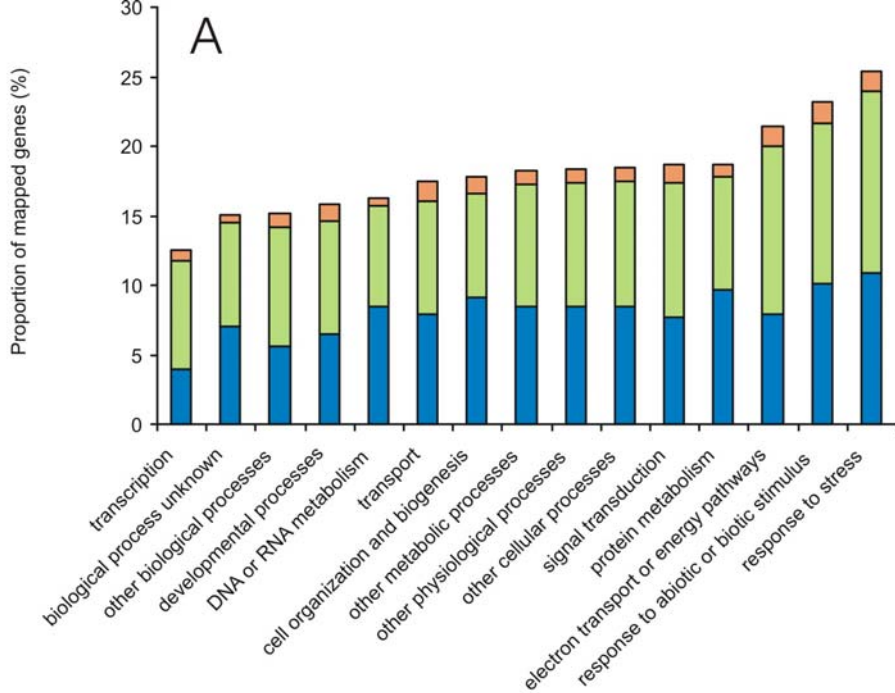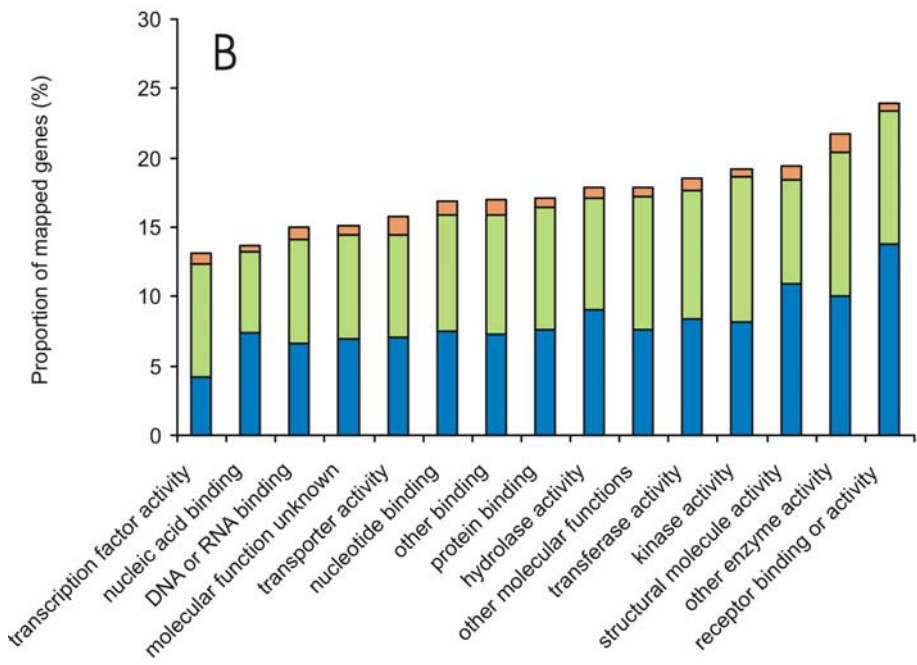

Supplement: pnas_0610429104_8.pdf [file pnas_0610429104_8.pdf]
